# Supplementary material for: In silico drug screening by using genome-wide association study data repurposed dabrafenib, an anti-melanoma drug, for Parkinson’s disease
Source: PubMed Central journal article supplement (PMC6216208; doi:10.1093/hmg/ddy279), 2018-08-22
Supplement: ddy279_supp.pdf [file ddy279_supp.pdf]

## **Supplementary Material**

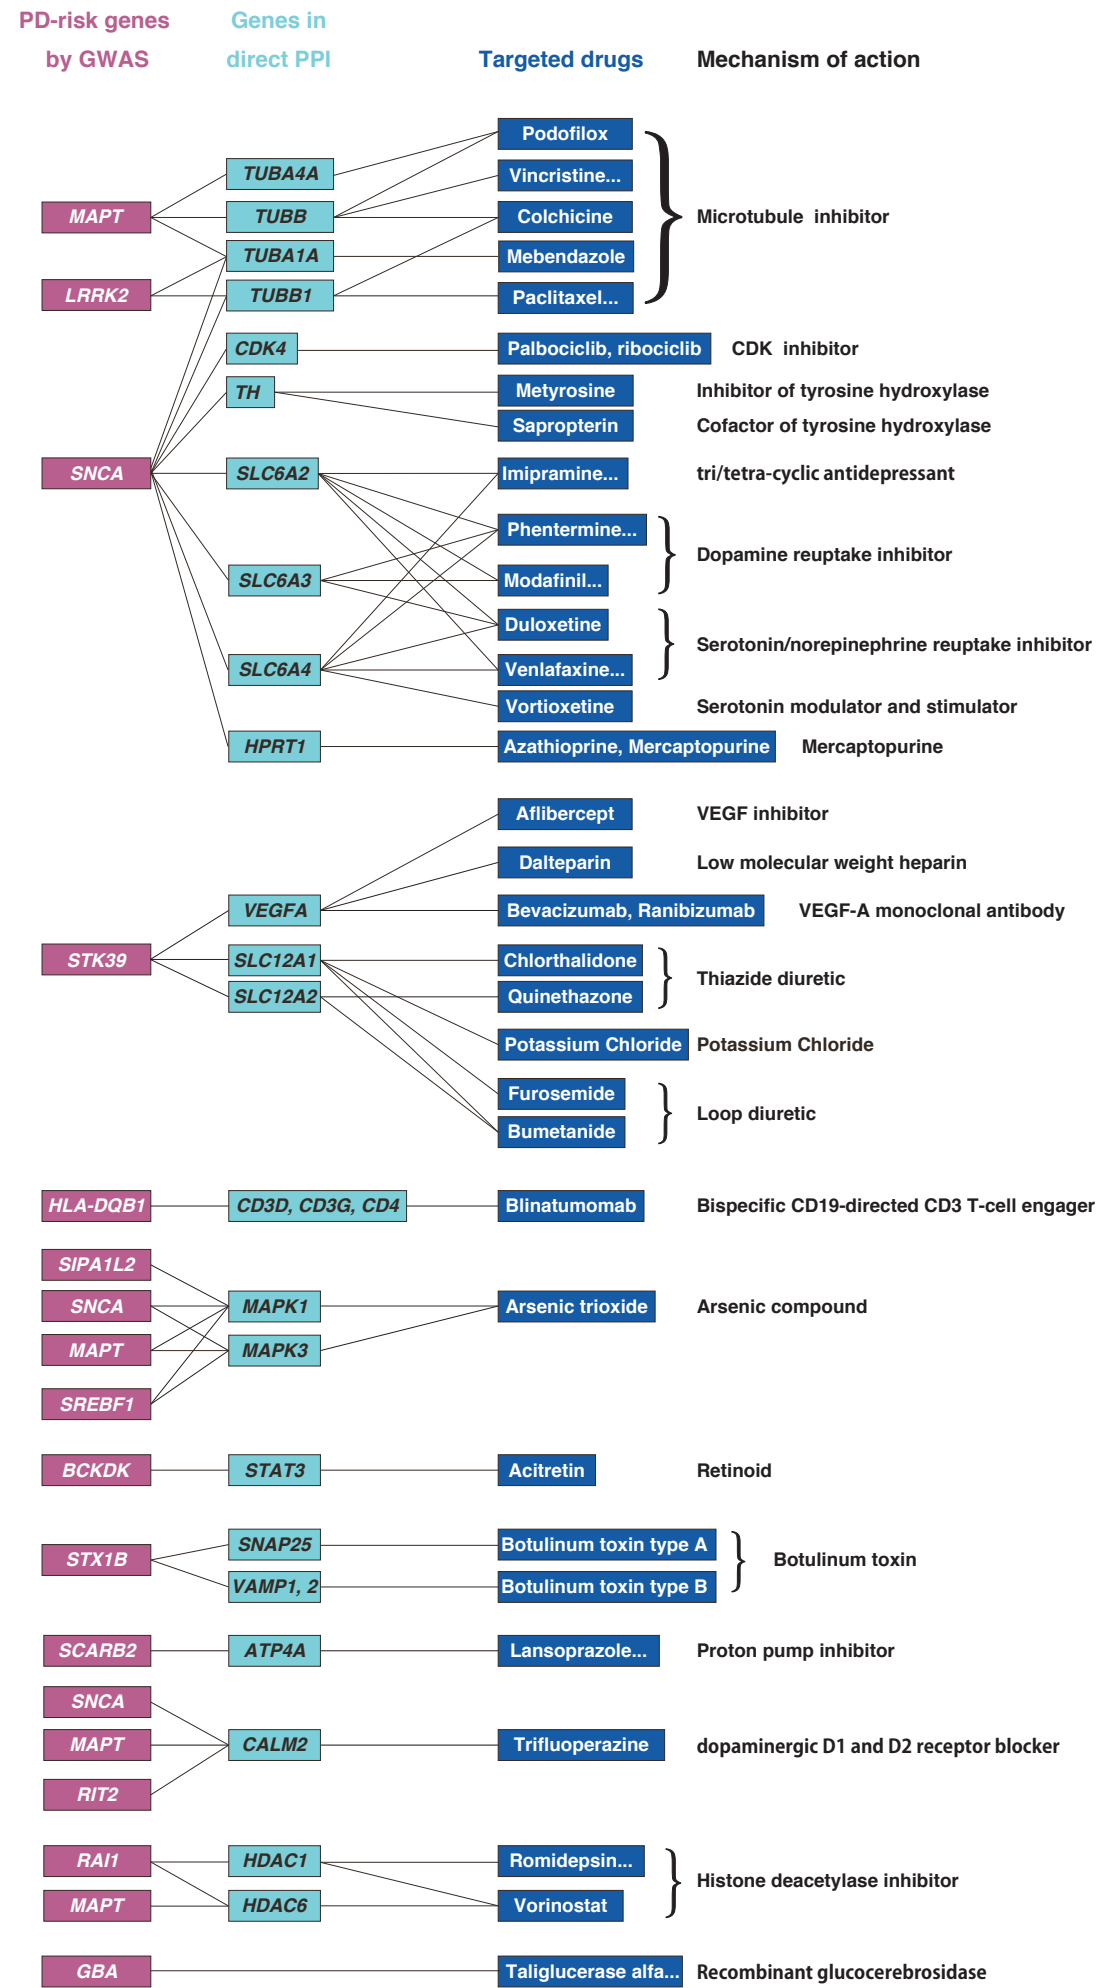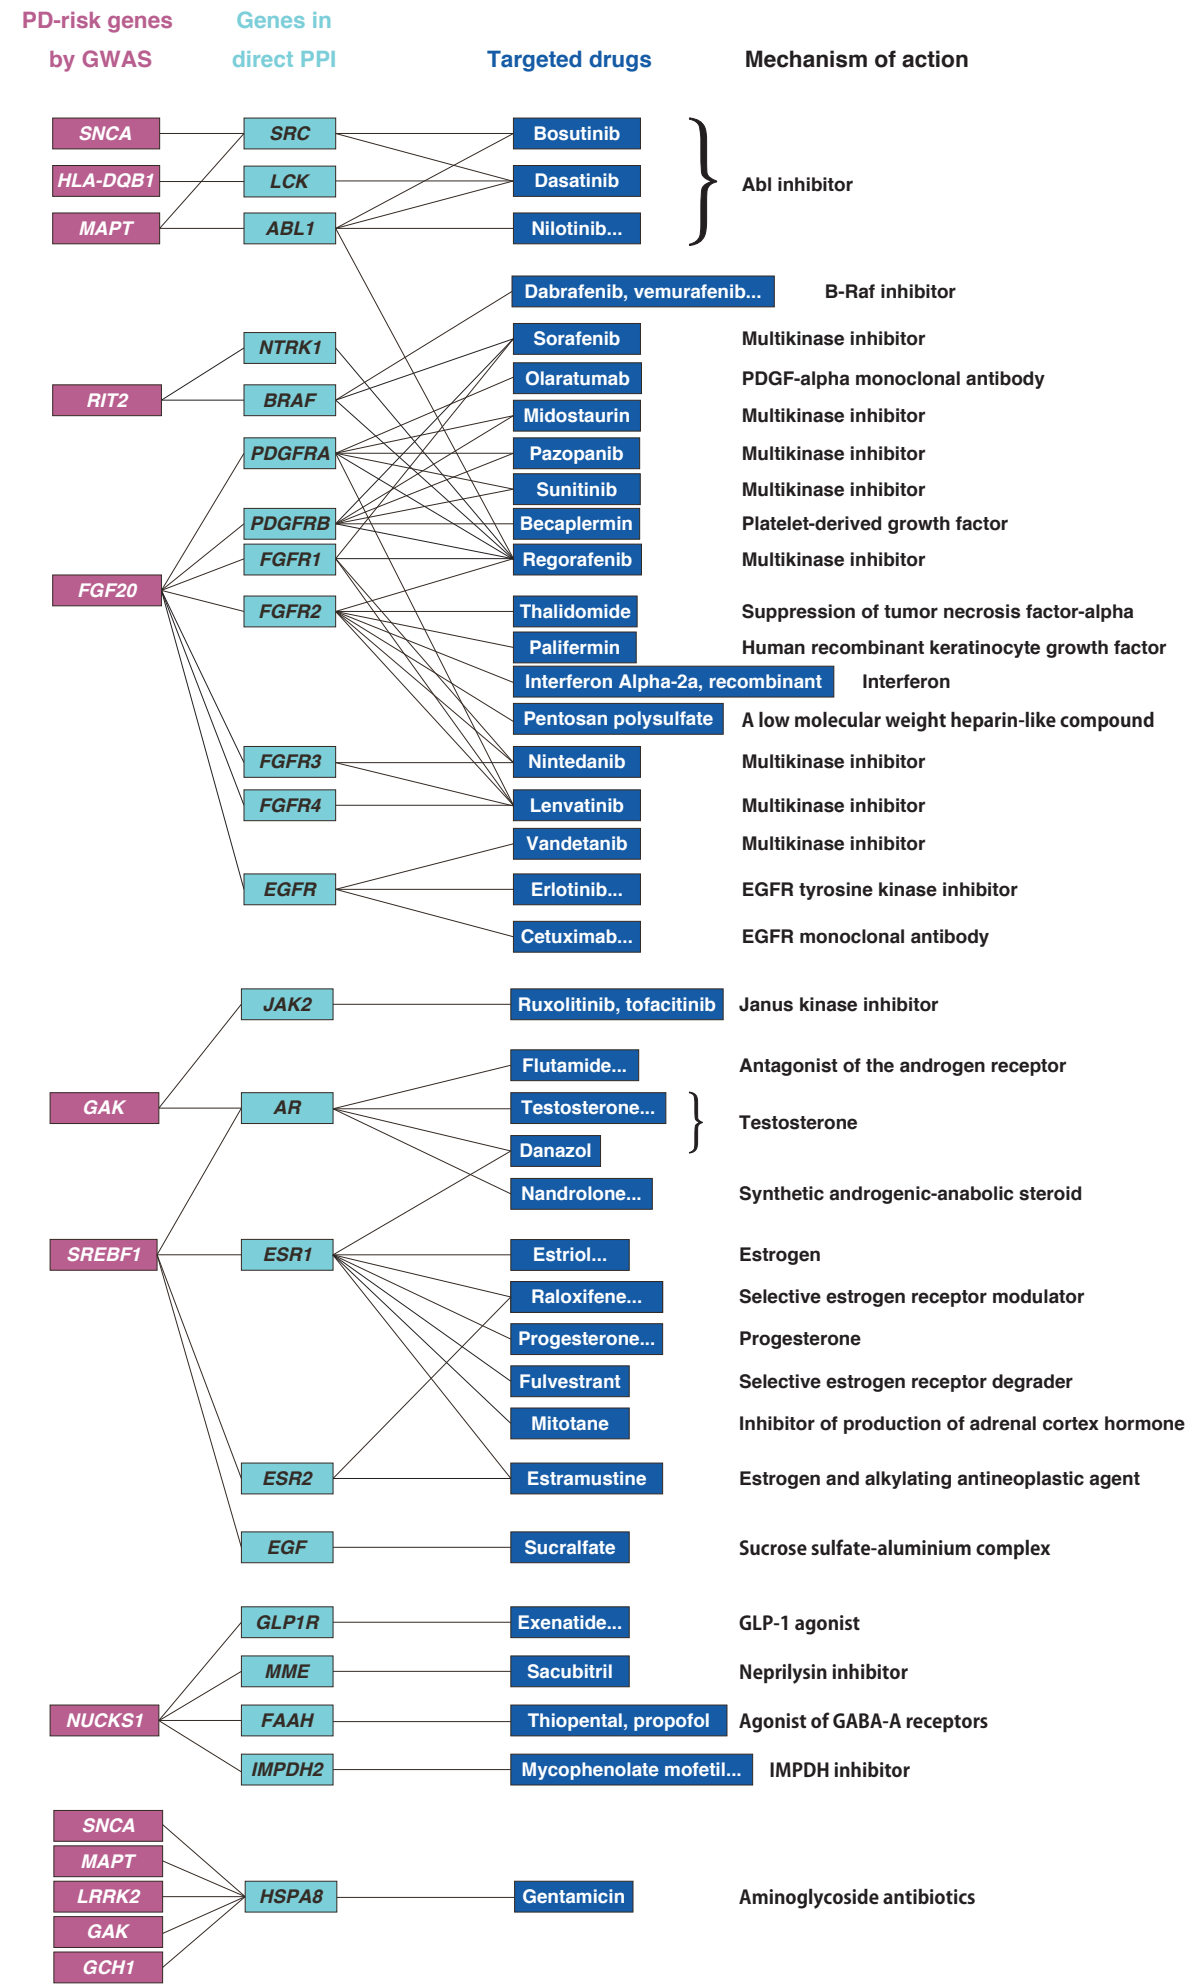

**Supplementary Figure S1. Connection between PD risk genes and FDA-approved drugs.**

Full lists of the connections between PD risk genes by GWAS (magenta boxes), genes from the expanded PPI network (turquoise boxes), and FDA-approved drugs (blue boxes). Drugs were divided into 57 families by their mechanisms of action. Black lines indicate connections.

### Dasatinib

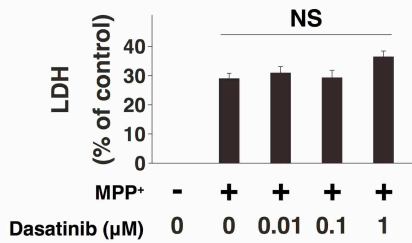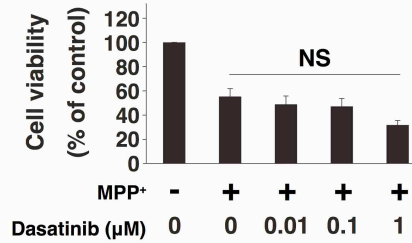

### Duloxetine

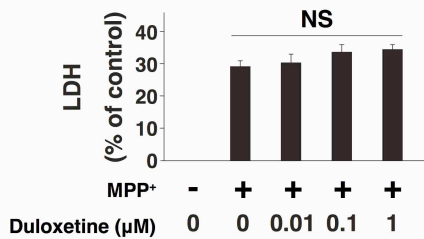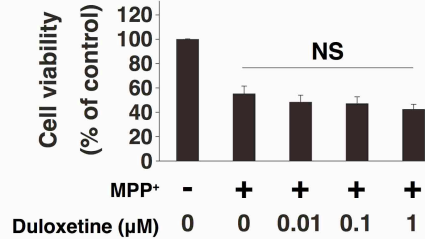

### Furosemide

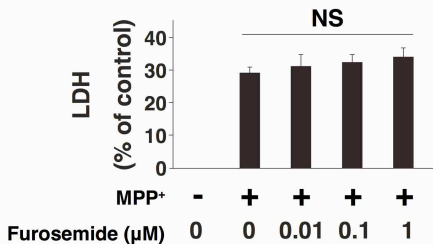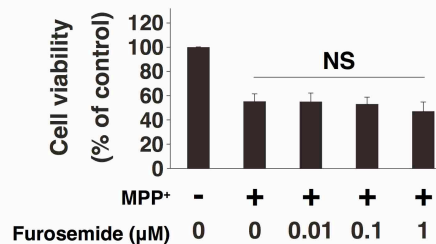

### Regorafenib

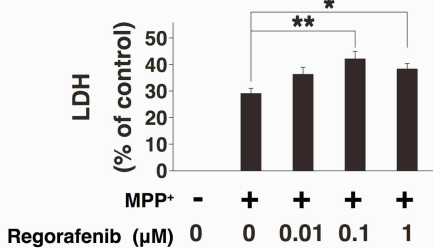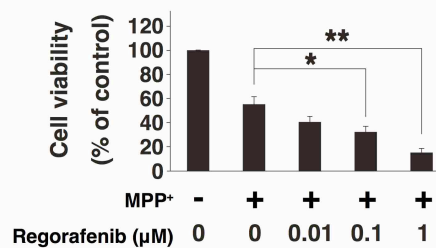

## Supplementary Figure S2. Results of the LDH and cell viability assay of cells treated with the candidate drugs.

Cells were treated with the indicated drugs, and LDH release and cell viability was measured 24 hours after MPP<sup>+</sup> (3 mM) treatment. Dasatinib, duloxetine, furosemide, and regorafenib could not inhibit LDH release and the loss of cell viability at 24 hours after MPP<sup>+</sup> (3 mM) treatment. Regorafenib also showed

significant cytotoxic effects. Data represent the mean  $\pm$  s.e.m. \*,  $p < 0.05$  and \*\*,  $p < 0.01$  compared with MPP<sup>+</sup> alone; NS, not significant (one-way ANOVA with the Tukey post-hoc test; n = 3 per group).

**A**

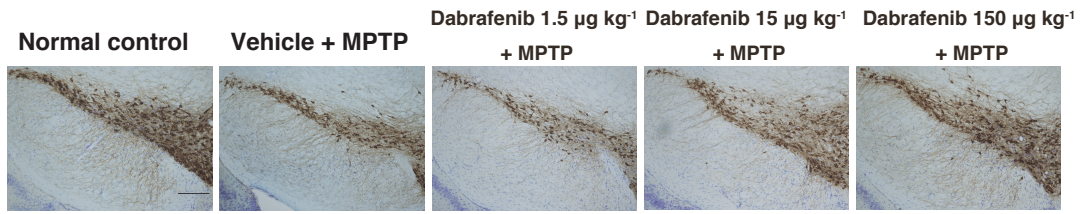

**B**

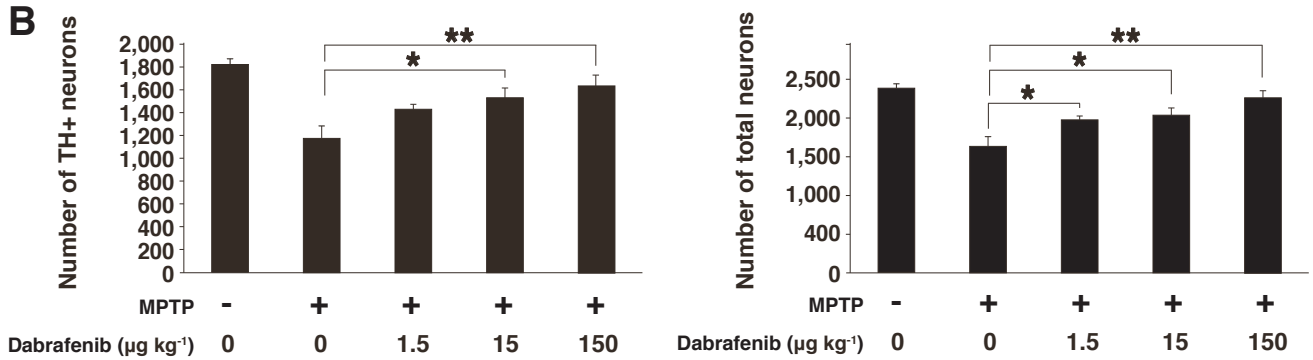

**C**

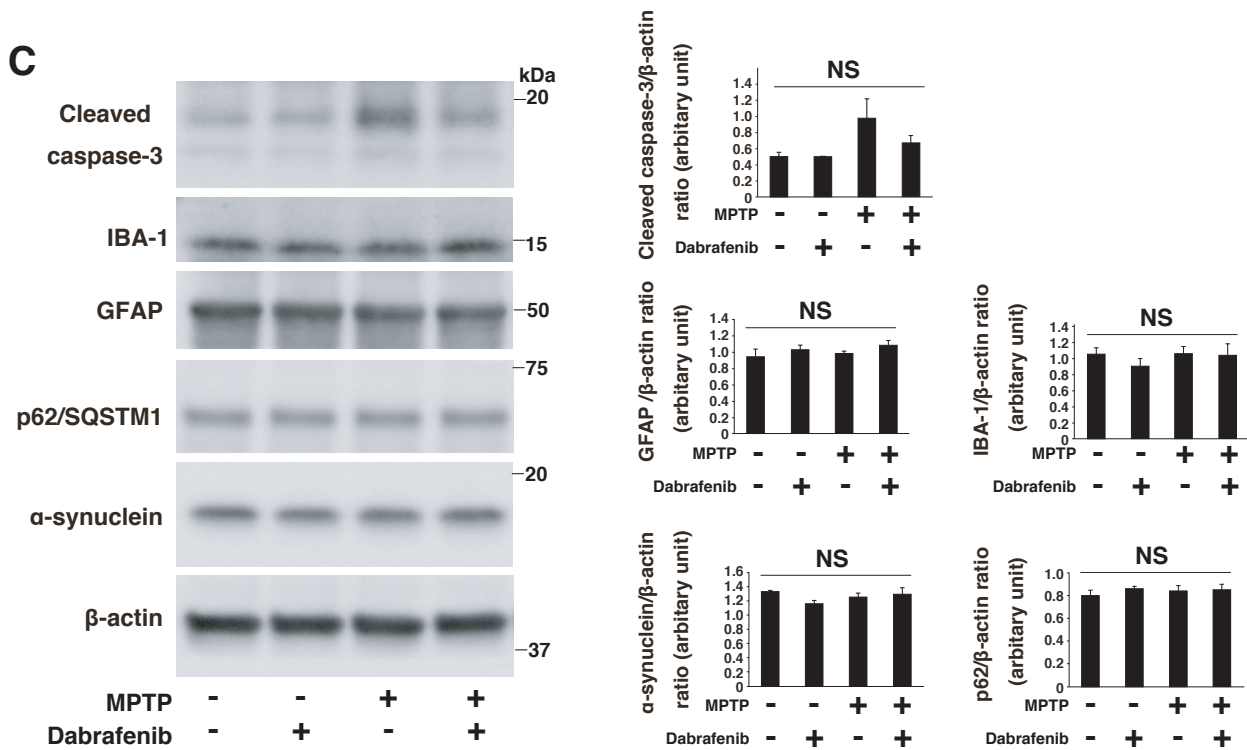

**Supplementary Figure S3. Dabrafenib showed cytoprotective effects at one week after MPTP intoxication.**

(A) Immunohistochemistry for TH on midbrain sections. Scale bar represents 200 µm.

(B) Stereological counts of TH-positive and total neurons in the substantia nigra pars compacta at one week after MPTP intoxication. Data represent mean  $\pm$  s.e.m. \*,  $p < 0.05$  and \*\*,  $p < 0.01$  compared with vehicle + MPTP group (one-way ANOVA followed by the Tukey post-hoc test;  $n = 3-5$  per group).

(C) Immunoblotting for cleaved caspase-3,  $\alpha$ -synuclein, p62, GFAP, and IBA-1 at three weeks after MPTP intoxication. Data represent mean  $\pm$  s.e.m. (one-way ANOVA followed by the Tukey post-hoc test;  $n = 3-4$  per group).

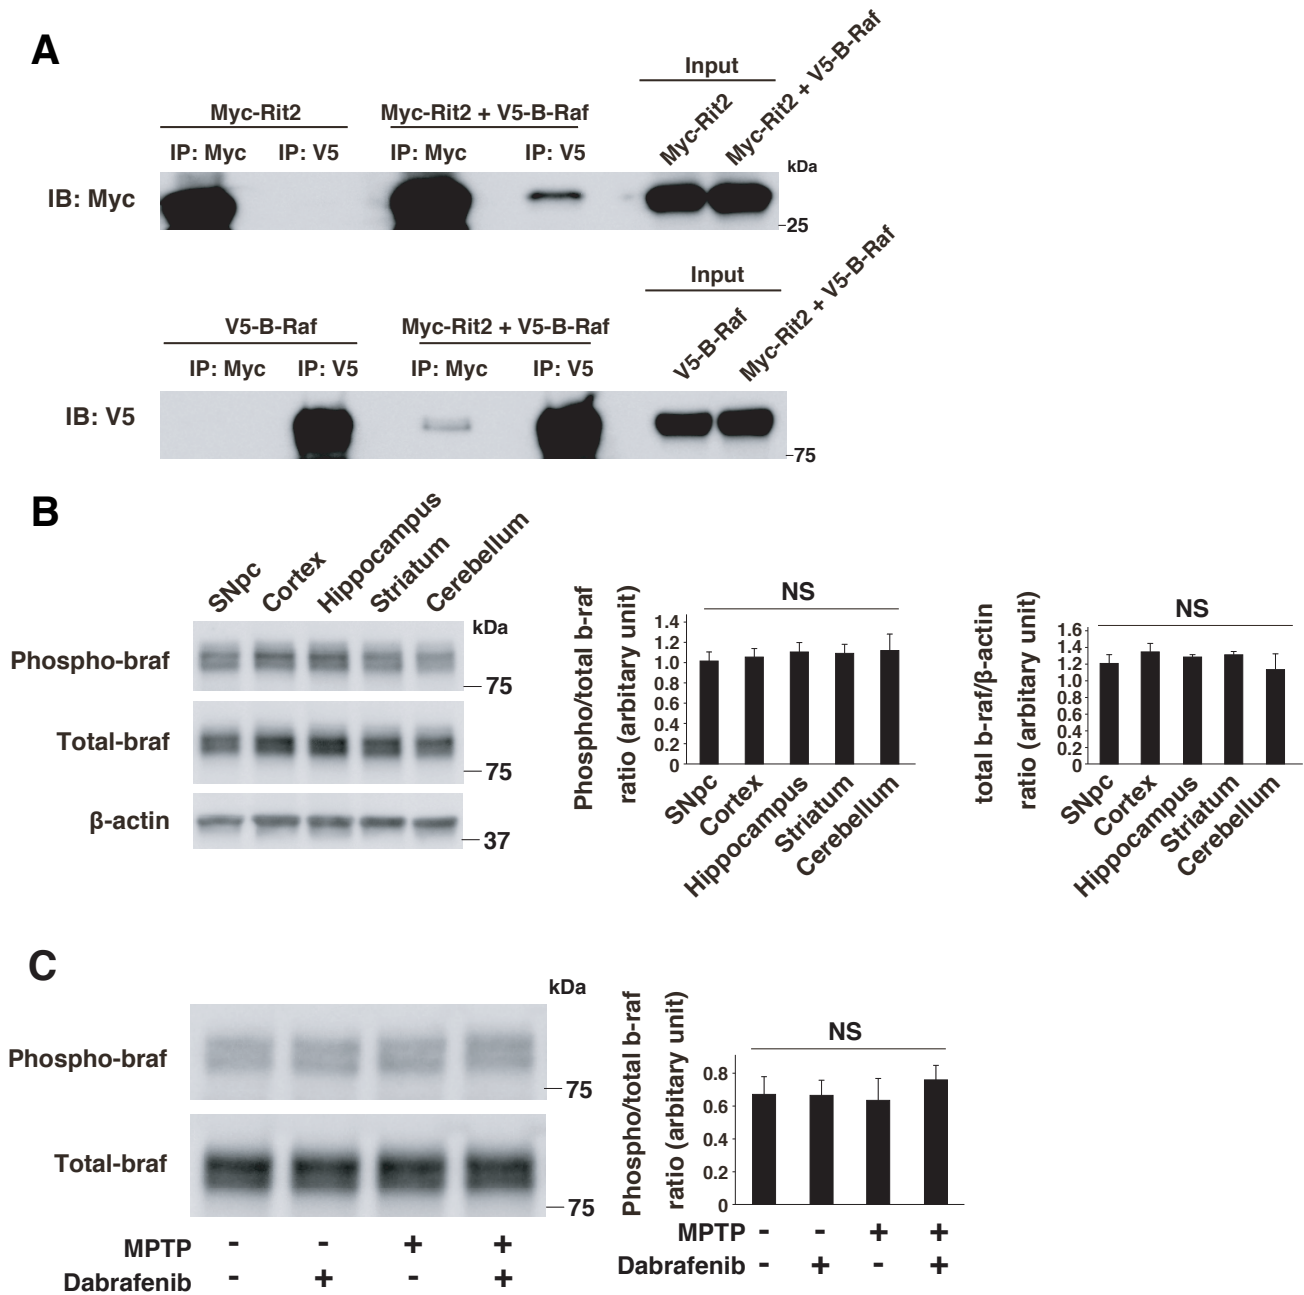

**Supplementary Figure S4. Interaction between Rit2 and B-Raf.**

(A) Co-immunoprecipitation of Rit2 and B-Raf expressed in HEK293T cells. In lysates of co-transfected cells, the precipitated Rit2 or B-Raf was detected by immunoblotting with an anti-c-Myc or anti-V5 antibody. The results are representative of three independent experiments.

(B) Western blotting for phospho- and total B-Raf in SNpc, the cortex, hippocampus, striatum, and cerebellum of control mice. Data represent mean  $\pm$  s.e.m. (one-way ANOVA followed by the Tukey post-hoc test; n = 3-4 per group).



(C) Western blotting for phospho- and total B-Raf following exposure to MPTP and/or dabrafenib at three weeks after MPTP intoxication. Data represent mean  $\pm$  s.e.m. (one-way ANOVA followed by the Tukey post-hoc test; n = 3-4 per group).

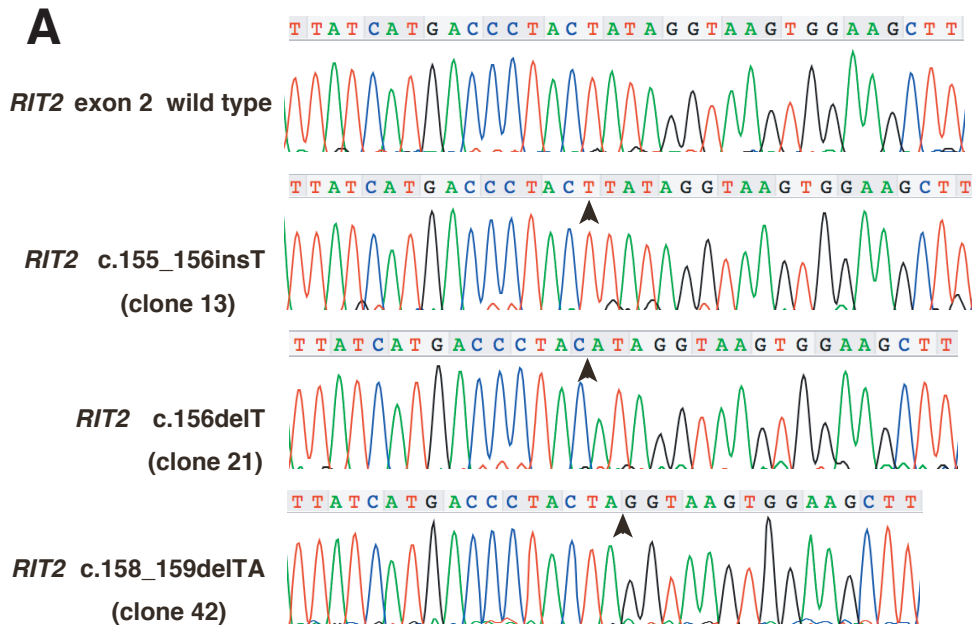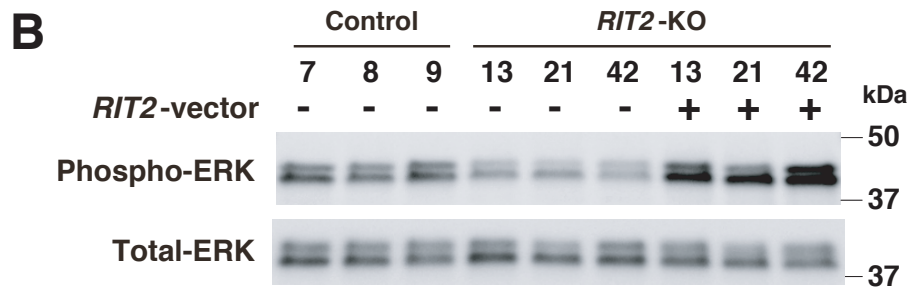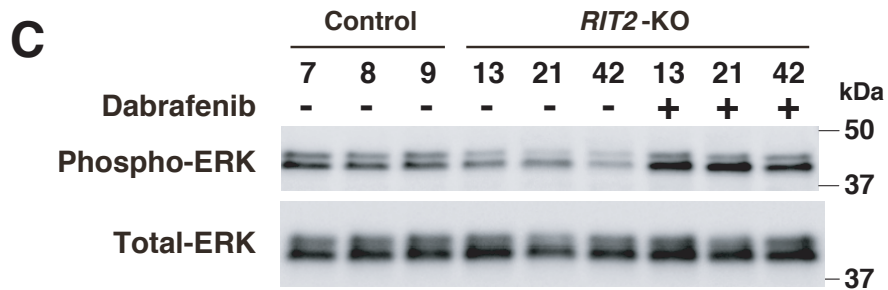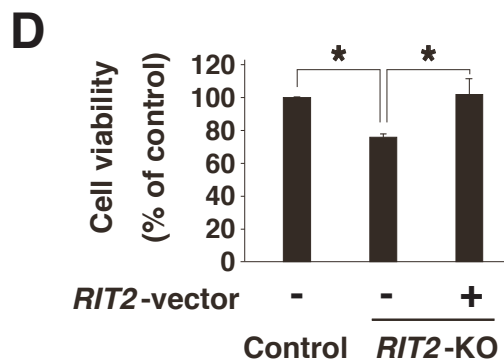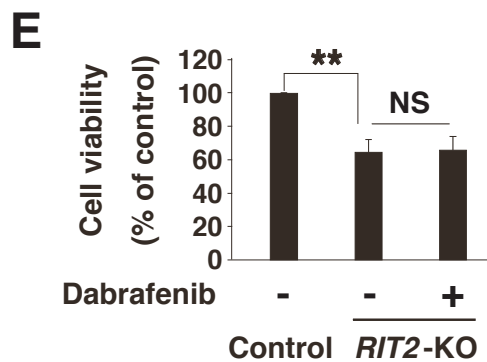

**Supplementary Figure S5. Confirmation of each *RIT2* gene mutation.**

(A) CRISPR/Cas9-based frameshift mutations in exon 2 of the *RIT2* gene in SH-SY5Y cells were confirmed by sequencing. Black arrowheads indicate each insertion/deletion.

(B) Expression of phospho-ERK was reduced in *RIT2*-KO clones (13, 21, 42) compared with the control clones (7, 8, 9). Overexpression of *RIT2* in each *RIT2*-KO clone restored the phosphorylation of ERK.

(C) Dabrafenib upregulated the expression of phospho-ERK in each *RIT2*-KO clone.

(D) Cell viability in control and *RIT2*-KO cells. Cells were infected with a lentiviral vector overexpressing *RIT2* (MOI of 10), and cell viability was measured 48 hours after lentiviral transfection. Data represent the mean  $\pm$  s.e.m. \*,  $p < 0.05$  compared with *RIT2*-KO cells treated with an empty vector (one-way ANOVA with the Tukey post-hoc test;  $n = 4$  per group).

(E) *RIT2*-KO cells were treated with dabrafenib, and cell viability was measured after 48 hours of treatment. Data represent the mean  $\pm$  s.e.m. \*\*,  $p < 0.01$  compared with *RIT2*-KO cells treated with DMSO; NS, not significant (one-way ANOVA with the Tukey post-hoc test;  $n = 4$  per group).

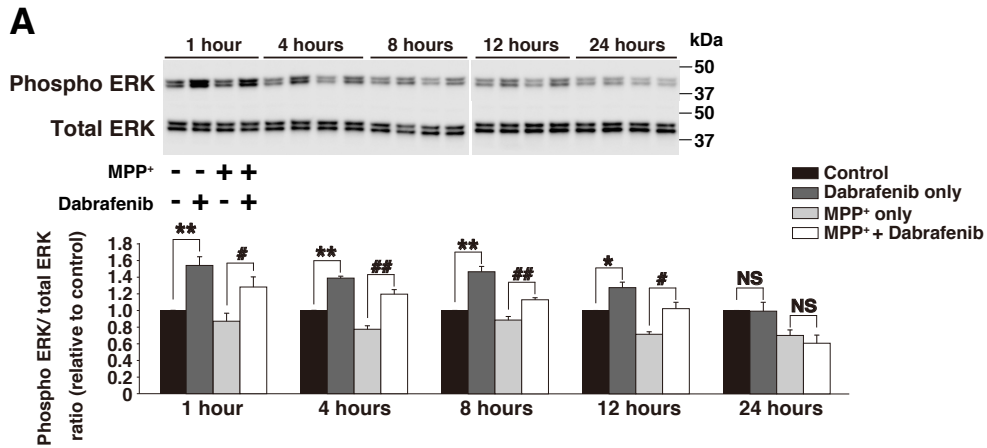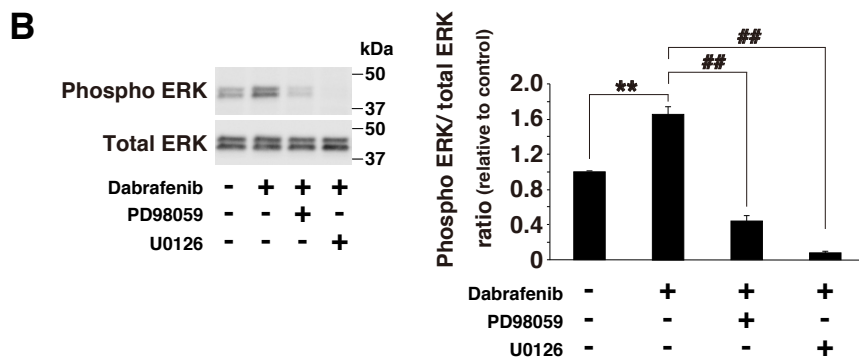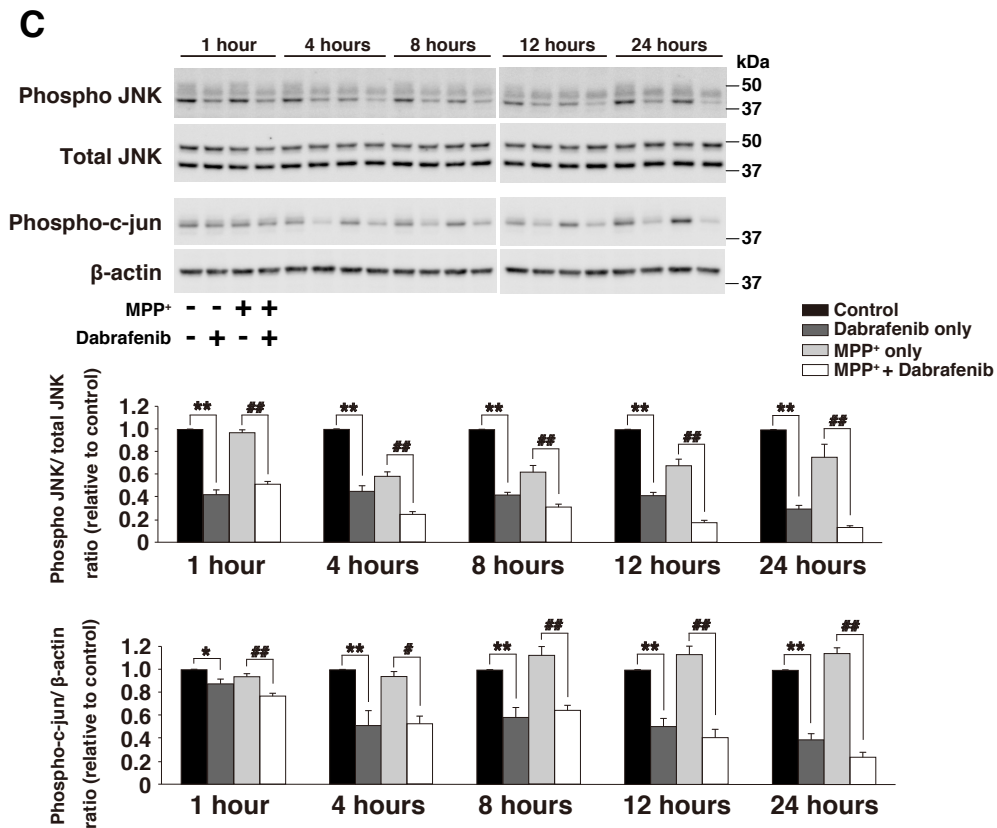

**Supplementary Figure S6. Western blot analysis of the sequential changes in phosphorylated ERK, JNK, and c-jun expression levels after drug treatment.**

(A) SH-SY5Y cells were exposed to dabrafenib (5  $\mu$ M) and/or MPP<sup>+</sup> (3 mM) for various times up to 24 hours. Data represent the mean  $\pm$  s.e.m. \*,  $p < 0.05$ , and \*\*,  $p < 0.01$  compared with control; #,  $p < 0.05$ , and ##,  $p < 0.01$  compared with MPP<sup>+</sup> alone (one-way ANOVA followed by the Tukey post-hoc test; n = 3 per group).

(B) The ERK inhibitors PD98059 (30  $\mu$ M) and U0126 (3  $\mu$ M) reduced the expression of phosphorylated ERK by dabrafenib (5  $\mu$ M) in SH-SY5Y cells at one hour after drug treatment. Data represent the mean  $\pm$  s.e.m. \*\*,  $p < 0.01$  compared with control; ##,  $p < 0.01$  compared with dabrafenib alone (one-way ANOVA followed by the Tukey post-hoc test; n = 3 per group).

(C) SH-SY5Y cells were exposed to dabrafenib (5  $\mu$ M) and/or MPP<sup>+</sup> (3 mM) for various periods of time up to 24 hours.

Data represent the mean  $\pm$  s.e.m. \*,  $p < 0.05$  and \*\*,  $p < 0.01$  compared with control; ##,  $p < 0.01$  compared with MPP<sup>+</sup> alone (one-way ANOVA followed by the Tukey post-hoc test; n = 3 per group).

Supplementary Table S1. Meta-analysis for rs4130047 by PDGene.

MyMeta result for rs4130047

To change your data for this meta-analysis please click here

| Polymorphism | Location (hg19) | Gene | Ethnicity | # Samples | # Studies | Allele contrast | Meta OR (95%CI)    | Meta P value | I2 (95%CI)  |
|--------------|-----------------|------|-----------|-----------|-----------|-----------------|--------------------|--------------|-------------|
| rs4130047    | chr18:40678235  | RIT2 | All: C, J | NA        | 15        | C vs. T         | 1.11 (1.08 - 1.15) | 6.43e-11     | 24 (0 - 59) |
| rs4130047    | chr18:40678235  | RIT2 | C         | NA        | 14        | C vs. T         | 1.1 (1.06 - 1.14)  | 4.52e-08     | 0 (0 - 53)  |

PDGene meta-analysis for rs4130047 (RIT2): C vs. T

|                                           | OR   | 95% CI      | I <sup>2</sup> |
|-------------------------------------------|------|-------------|----------------|
| All studies                               | 1.11 | [1.08,1.15] | 24             |
| Caucasian studies                         | 1.10 | [1.06,1.14] | 0              |
| Study specific ORs                        |      |             |                |
| Nalls, 2014, France (IPDGC) [C]           | 1.03 | [0.81,1.31] |                |
| Nalls, 2014, Iceland (IPDGC-deCODE) [C]   | 1.01 | [0.86,1.19] |                |
| Nalls, 2014, Netherlands (IPDGC) [C]      | 1.09 | [0.96,1.24] |                |
| Nalls, 2014, USA (IPDGC-NIA) [C]          | 1.06 | [0.94,1.21] |                |
| Nalls, 2014, UK (IPDGC) [C]               | 1.03 | [0.95,1.13] |                |
| Nalls, 2014, 23andMe.v2 (USA, Europe) [C] | 1.14 | [1.07,1.21] |                |
| Nalls, 2014, 23andMe.v3 (USA, Europe) [C] | 1.05 | [0.94,1.16] |                |
| Nalls, 2014, USA (Ashkenazi) [C]          | 1.25 | [0.90,1.72] |                |
| Nalls, 2014, USA (NGRC) [C]               | 1.09 | [0.98,1.22] |                |
| Nalls, 2014, USA (HIHG) [C]               | 1.30 | [1.05,1.60] |                |
| Nalls, 2014, Iceland (CHARGE-AGES-RS) [C] | 1.07 | [0.84,1.38] |                |
| Nalls, 2014, USA (PROGENI-GenePD) [C]     | 1.26 | [1.08,1.47] |                |
| Nalls, 2014, USA (CHARGE-CHS) [C]         | 1.03 | [0.76,1.40] |                |
| Nalls, 2014, USA (CHARGE-FHS) [C]         | 1.24 | [0.85,1.82] |                |
| Satake, 2009, Japanese [J]                | 1.27 | [1.14,1.41] |                |

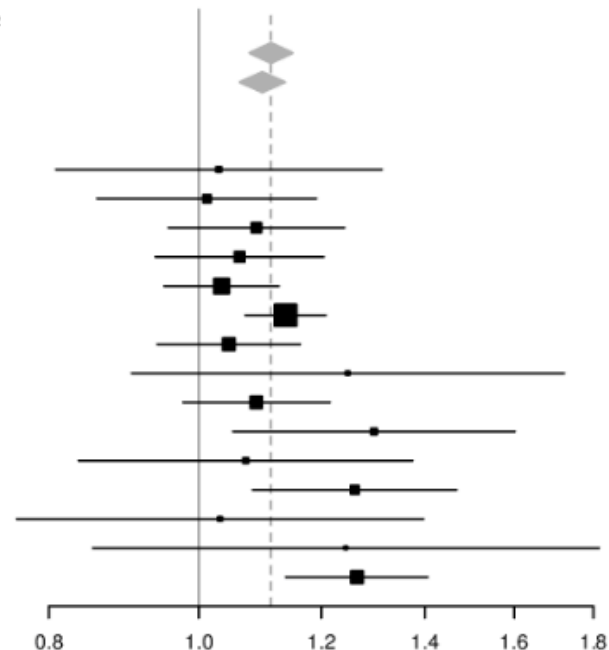

[C], Caucasian; [J], Japanese
